# Supplementary material for: Pectic polysaccharide fromNelumbo nuciferaleaves promotes intestinal antioxidant defensein vitroandin vivo
Source: Royal Society of Chemistry journal article supplement (doi:10.1039/d1fo02354c), 2021-01-01
Supplement: d1fo02354c1.pdf [file d1fo02354c1.pdf]

## Supplement data

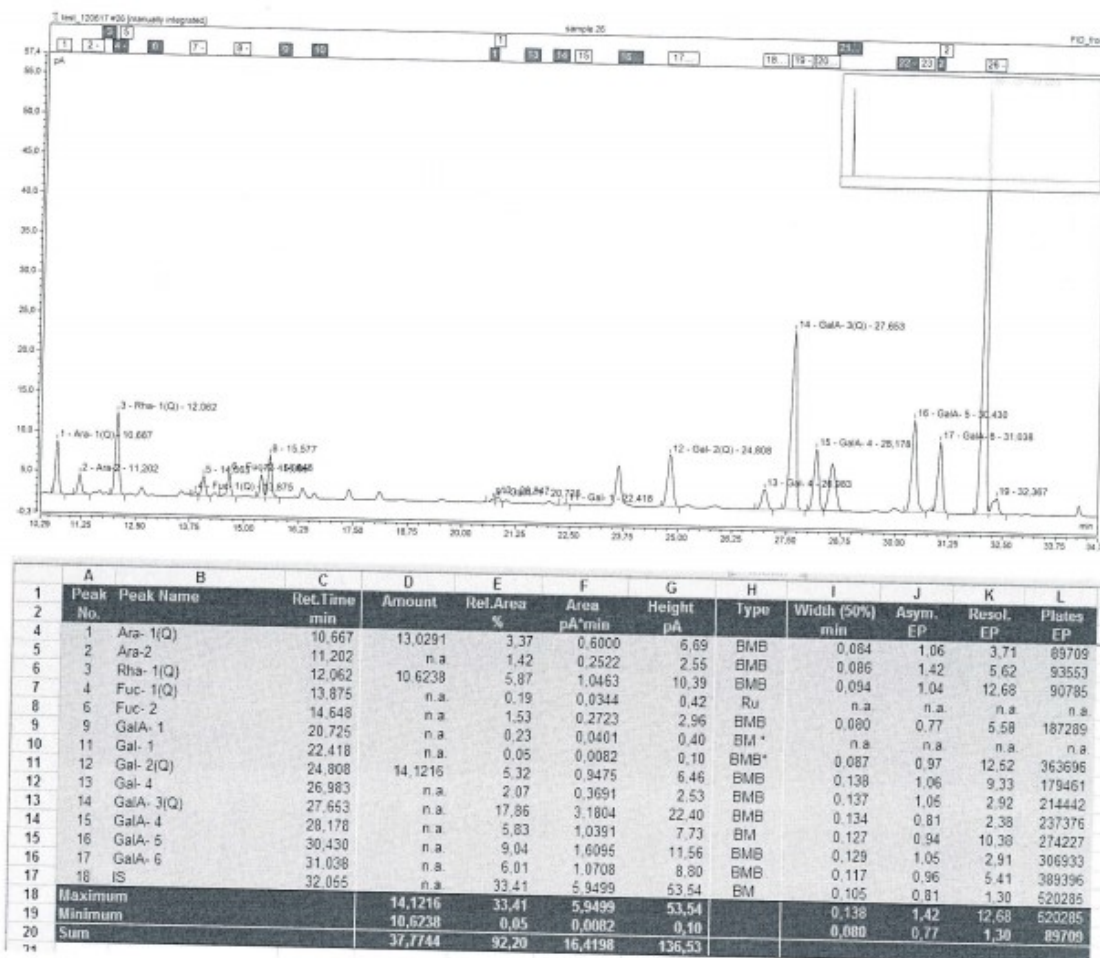

Supplementary Figure.1 GC chromatography for monosaccharide determination.

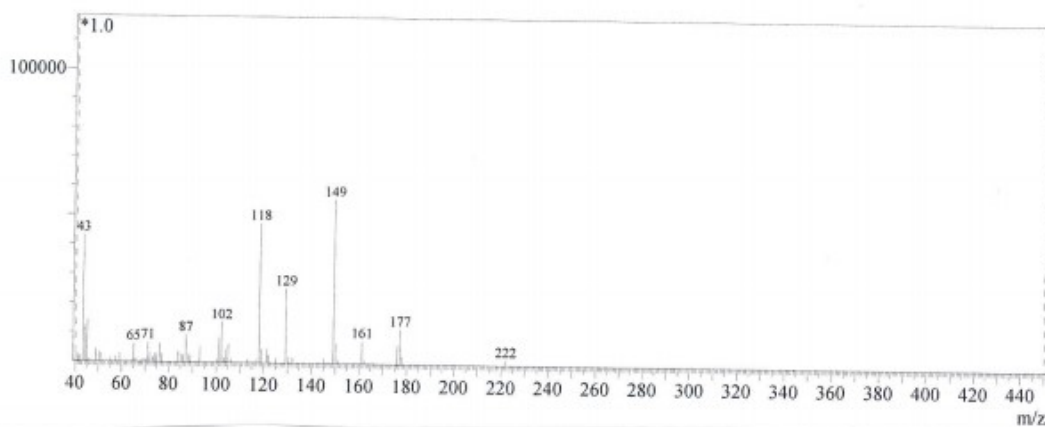

Supplementary Figure.2 Mass Spectra of terminal linked Arabinose

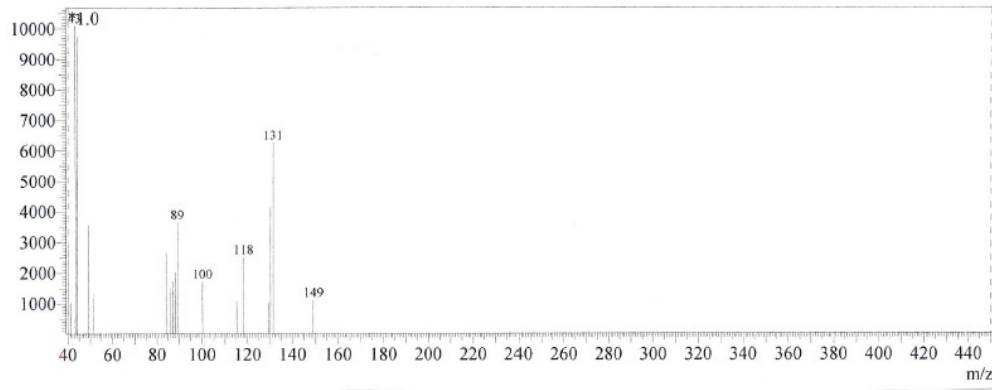

**Supplementary Figure.3 Mass spectra for 1,3 linked Rhamnose**

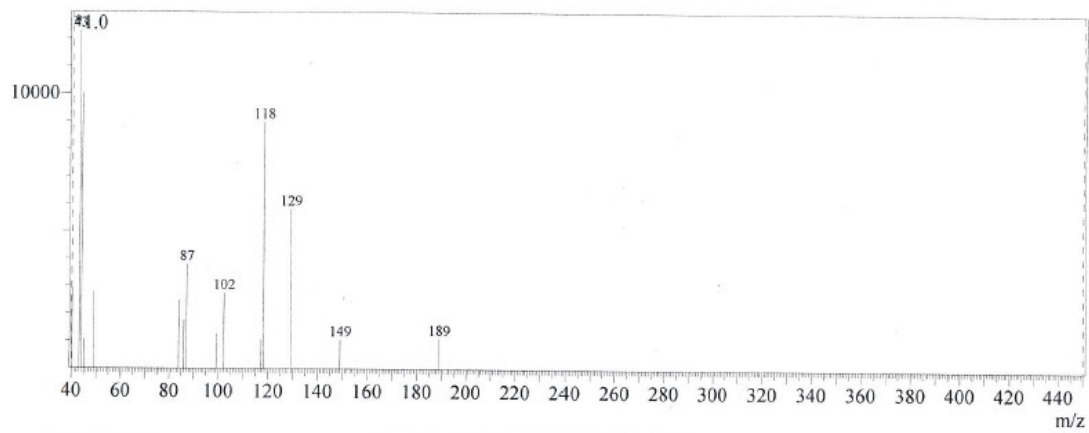

**Supplementary Figure.4 Mass spectra for 1,5 linked arabinose**

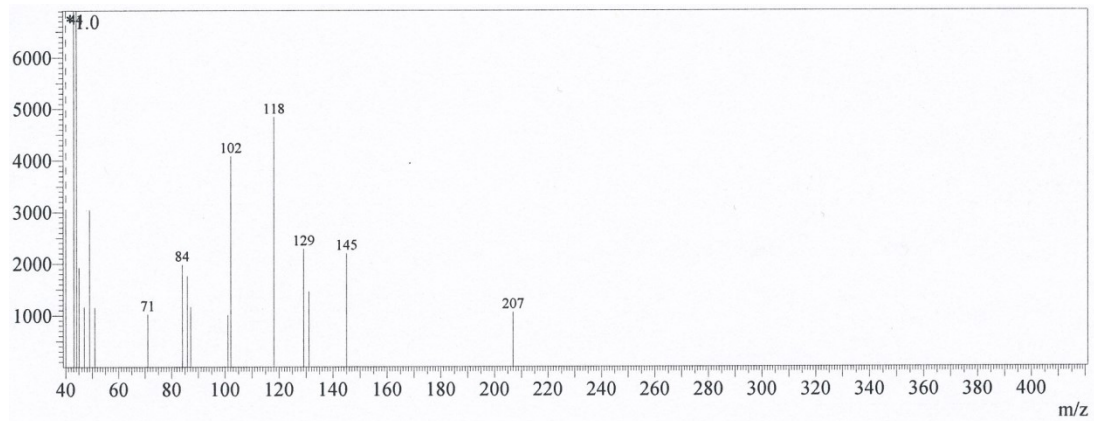

**Supplementary Figure.5 Mass spectra for terminal linked galacturonic acid**

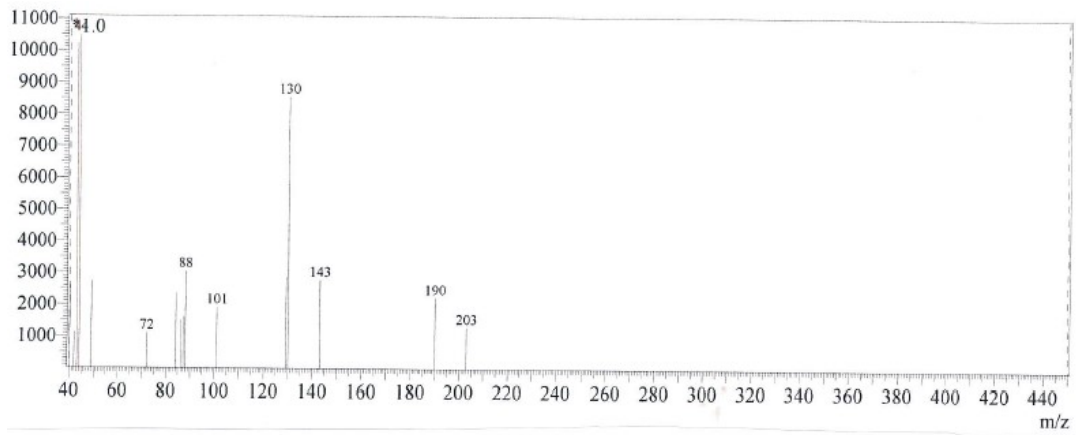

**Supplementary Figure. 6, Mass spectra for 1,2,4 linked Rhamnose**

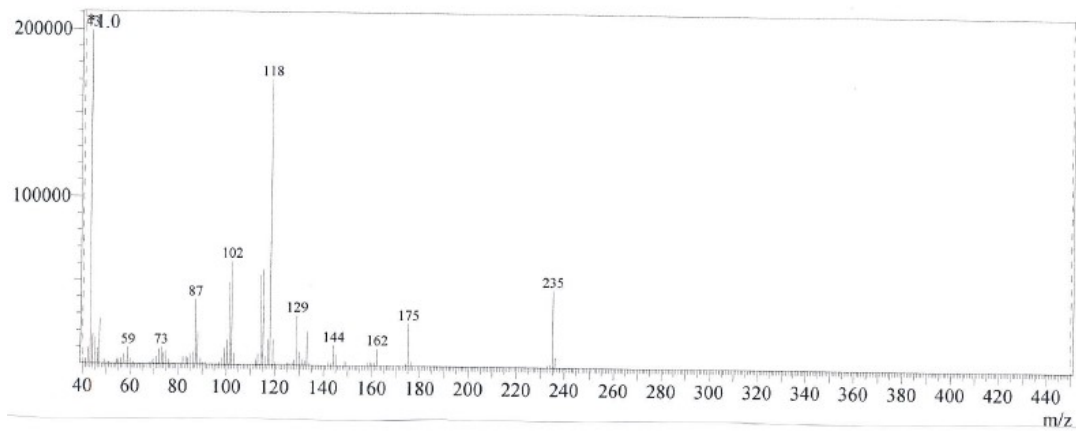

**Supplementary Figure.7 Mass spectra for 1, 4 linked galacturonic acid**

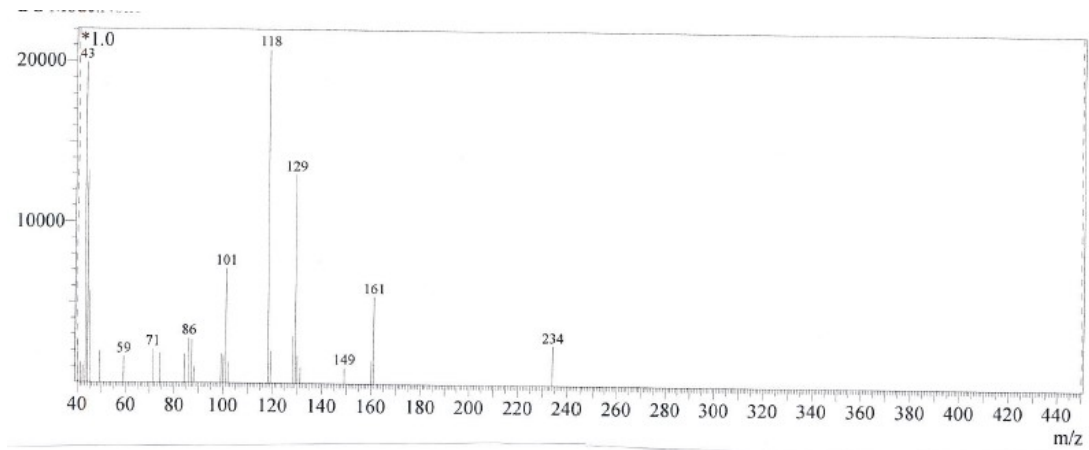

**Supplementary Figure.8 Mass spectra for 1, 3 linked galactose**

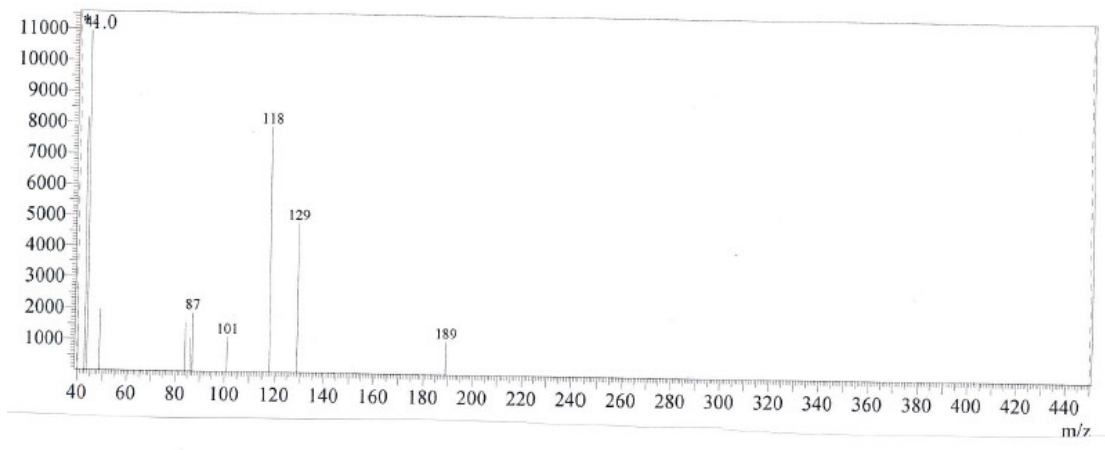

Supplementary Figure.9 Mass spectra for 1, 3,6 linked galactose

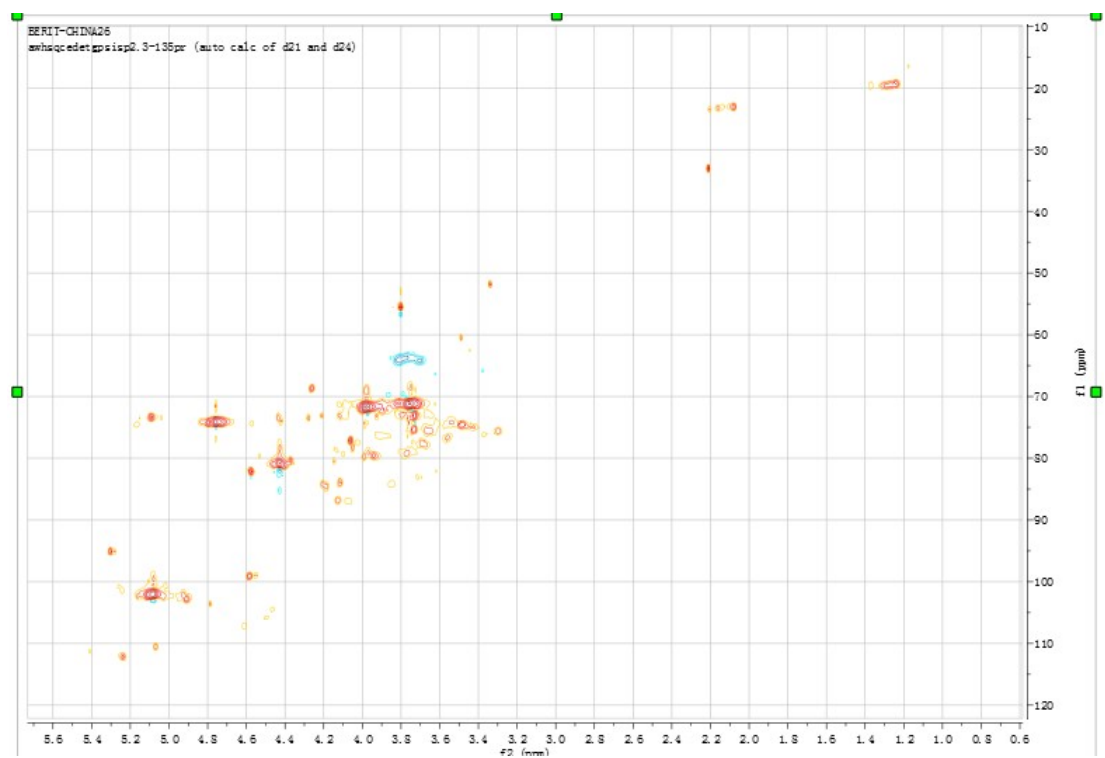

Supplementary Figure.10 HSQC NMR spectra of NNLP-I-I

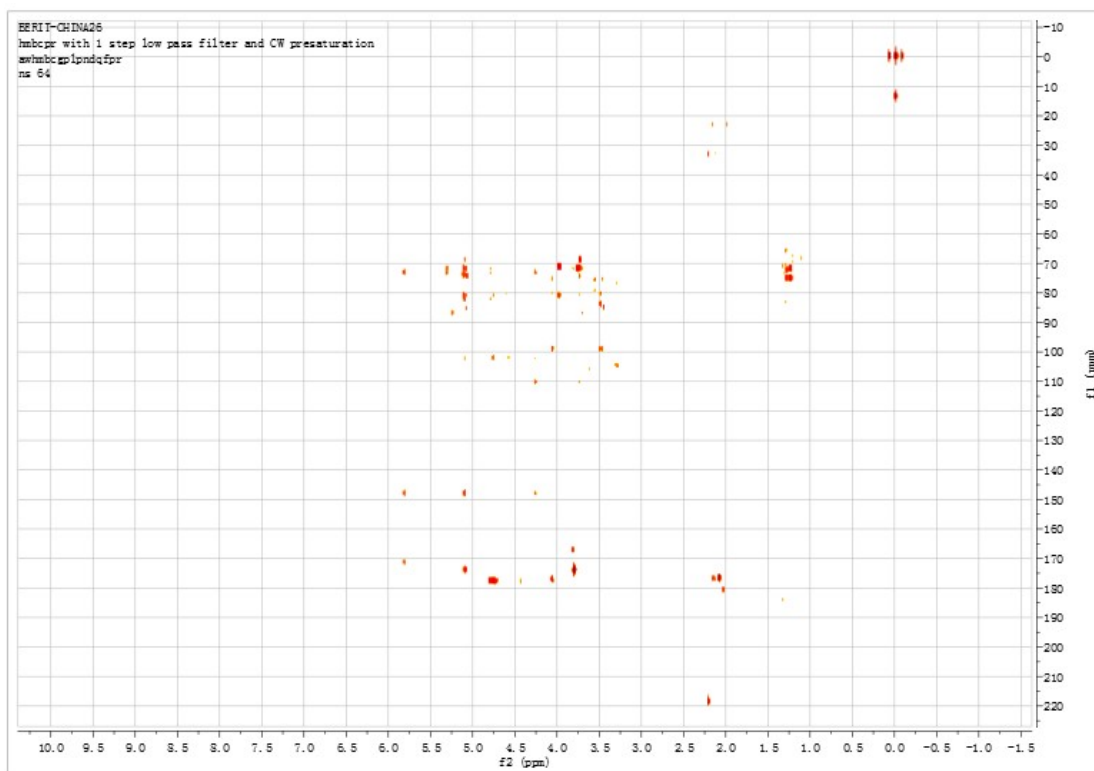

Supplementary Figure.11 HMBC NMR spectra of NNLP-I-I

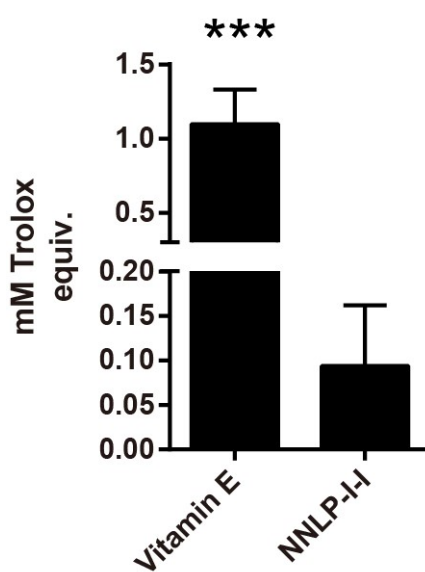

Supplementary Figure. 12. *In vitro* assay displays little antioxidant capacity of NNLP-I-I (50mg/ml) itself compared with Vitamin E (1mM). N=3.
